# Supplementary material for: Molybdenum nitrides from structures to industrial applications
Source: publisher site journal article supplement (doi:10.1515/revce-2021-0002), 2021-08-23
Supplement: Supplementary file 1 [file j_revce-2021-0002_suppl.docx]

**Supplementary material**

**Molybdenum nitrides from structures to industrial applications: a review**

Zainab N. Jaf et al.

DOI 10.1515/revce-2021-0002

**Supplementary Table S1:** Geometrical features of the MoN*x* phases reported in the literature.

| **Mo-N system** | **Structure and space group** | **Lattice parameters (Å)** | **References** |
| --- | --- | --- | --- |
| *γ*-MoN*x*(*x*~0.5) | *fcc* rock salt , | *a* = 4.16 | High-pressure–high-temperature synthesis (Bull et al., 2006) |
| Mo2N | *fcc* | *a* = 4.16–4.19 | Reactive DC sputtering (Ihara et al., 1985) |
| *γ*-Mo2N | *Fcc* | *a* = 4.124 | Pulsed laser irradiation (Wu et al., 1997) |
| *c-Mo2N* | *Fcc* | *a* = 4.2 | Plasma immersion ion implantation (Mändl et al., 2004) |
| *β-*Mo2N | Body centred tetragonal phase a space group of I41/amd | *a* = 4.16  *c* = 8.0 | Plasma immersion ion implantation (Mändl et al., 2004) |
| *β*-Mo2N0.85 | Tetragonal | *a* = 4.199  c= 7.996 | Reactive DC magnetron sputtering (Stöber et al., 2015) |
| *β-*Mo2N | Tetragonal | *a* = 4.18  *c* = 7.99 | Expanding plasma microwave discharge (Jauberteau et al., 2009) |
| *β*-Mo16N7 | Tetragonal | *a* = 8.4  *c* = 8.0 | Heat treatment of calcium nitride and molybdenum (Karam and Ward, 1970) |
| MoN(0.5-1) | Cubic | *a* = 4.16–4.28 | LDA -DFT(Lowther, 2004) |
| *δ1*-MoN | Hexagonal WC type*m2* | *a* = 2.868  *c* = 2.810 | Plasma-enhanced chemical MoCl5 (Ganin et al., 2006) |
| *δ3*-MoN | Hexagonal NiAs-type *P63mc* | *a* = 5.73  *c* = 5.62 | GGA–DFT (Kanoun et al., 2007) |
| Mo5N6 | Hexagonal WC and NiAs structures | *a* = 4.89  *c* = 11.06 | Ammonolysis of MoS2 (Ganin et al., 2006). |
| *δ3*-MoN | Hexagonal NiAs-type *P63mc* | *a* = 5.71  *c* = 5.62 | LDA–DFT (Kanoun et al., 2007) |
| *δ1*-MoN | Hexagonal WC-like structure with space group m2 | *a* = 2.86  *c* = 2.84 | GGA–DFT (Zhao et al., 2010) |
| B1-MoN | Cubic NaCl-type structure with space group of | *a* = 4.25 | PAW–DFT (Papaconstantopoulos et al., 1985) |
| Mo5N6 | Filled 2H-MoS2 structure | *a* = 4.893  *c* =11.06 | Ammonolysis of MoS2 (Marchand et al., 1999) |


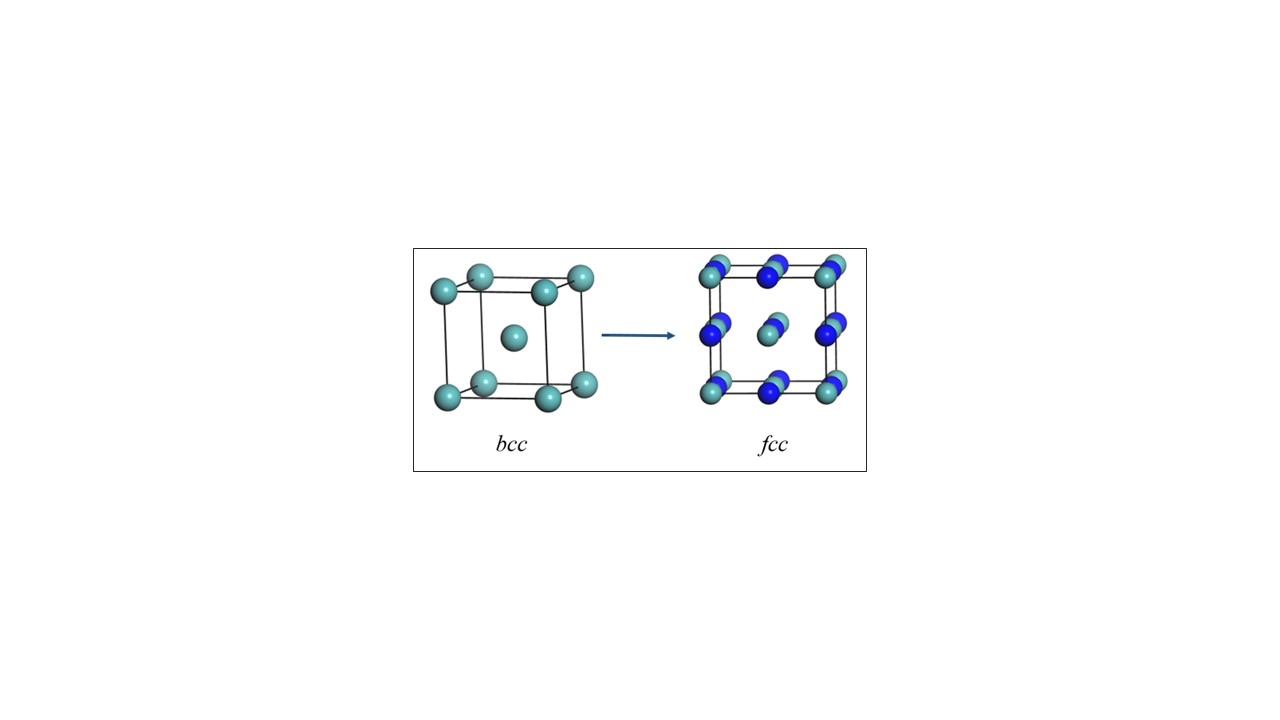


**Supplementary Figure S1:** Typical crystalline structures of metallic molybdenum (*bcc*) and molybdenum nitride (*fcc*) unit cells. Light blue and dark blue spheres denote Mo and N atoms, respectively.


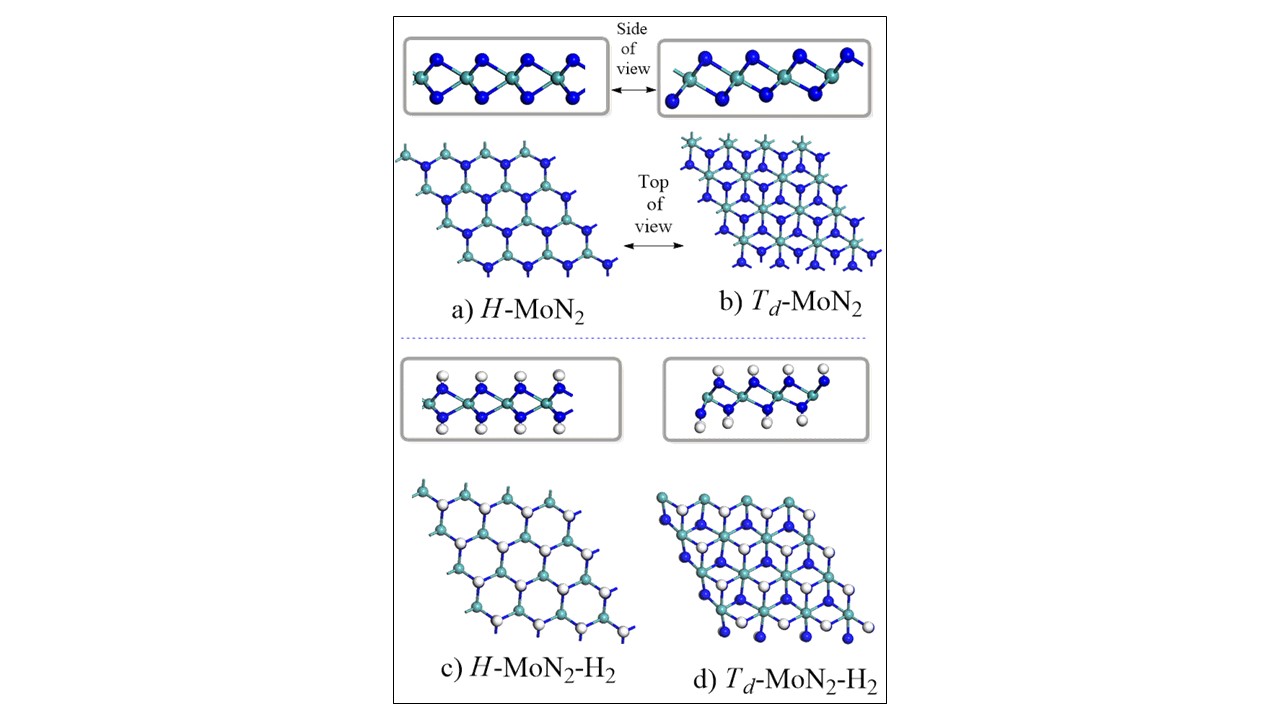


**Supplementary Figure S2:** Structural configurations of *H*–MoN2, *Td*–MoN2, *H*–MoN2-H2, and *Td*–MoN2–H2 sheets. White spheres correspond to H atoms (Wang and Ding, 2016). Reproduced with permission from the Royal Society of Chemistry.


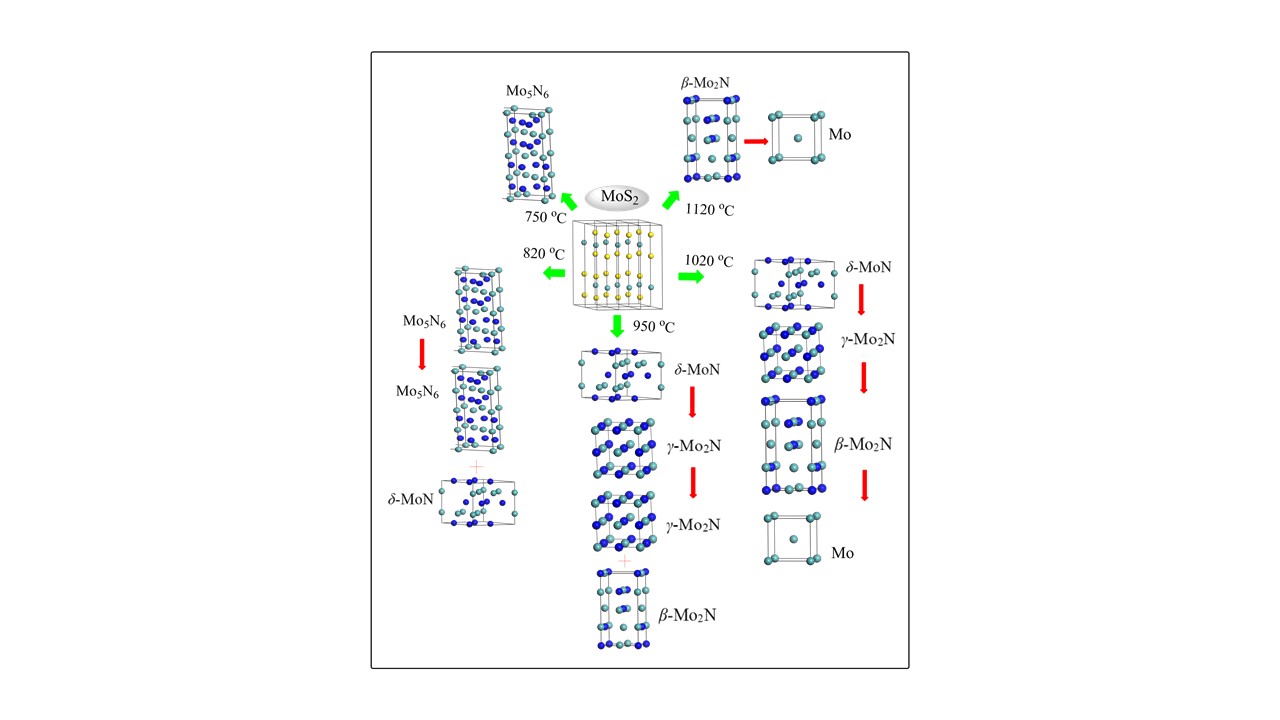


**Supplementary Figure S3:** Evolution of MoNx phases during MoS2 reduction by NH3 at various temperatures (Sun et al., 2018). Reproduced with permission from John Wiley and Sons.


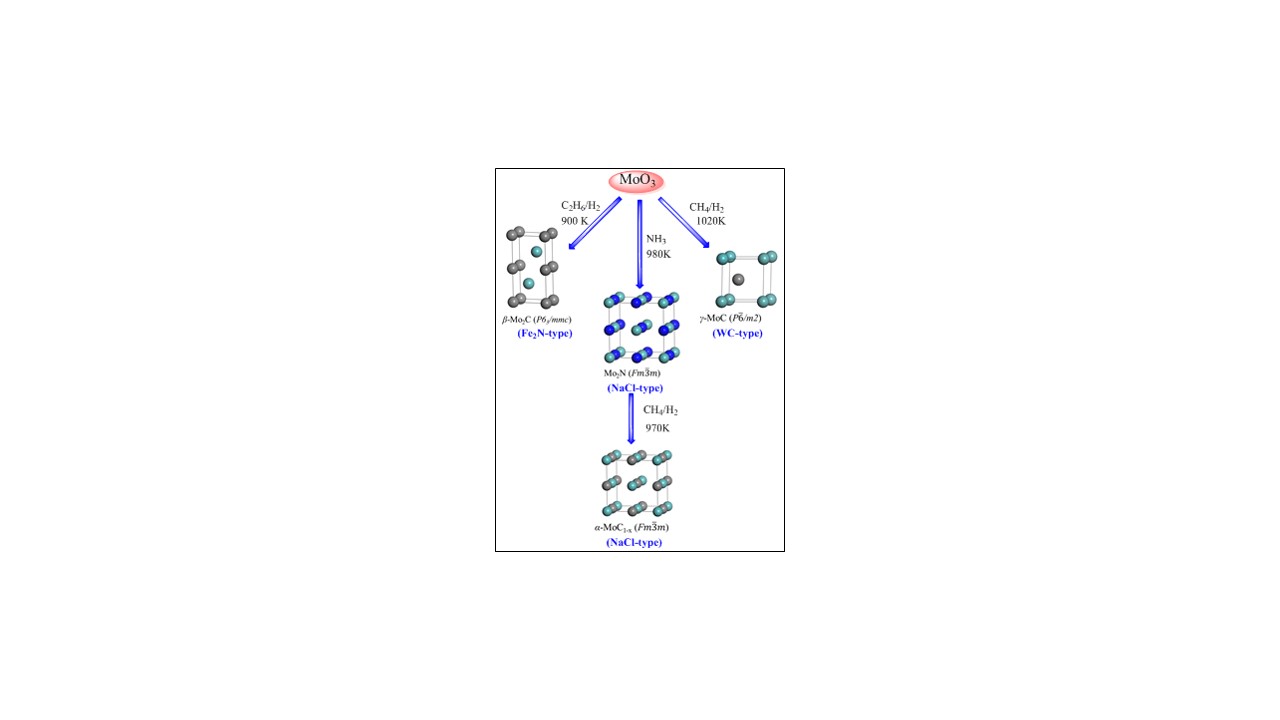


**Supplementary Figure S4:** Pathways to Mo–N and Mo–C phases via temperature programmed reaction (TPR) of MoO3 (Claridge et al., 2000). Reproduced with permission from the American Chemical Society.


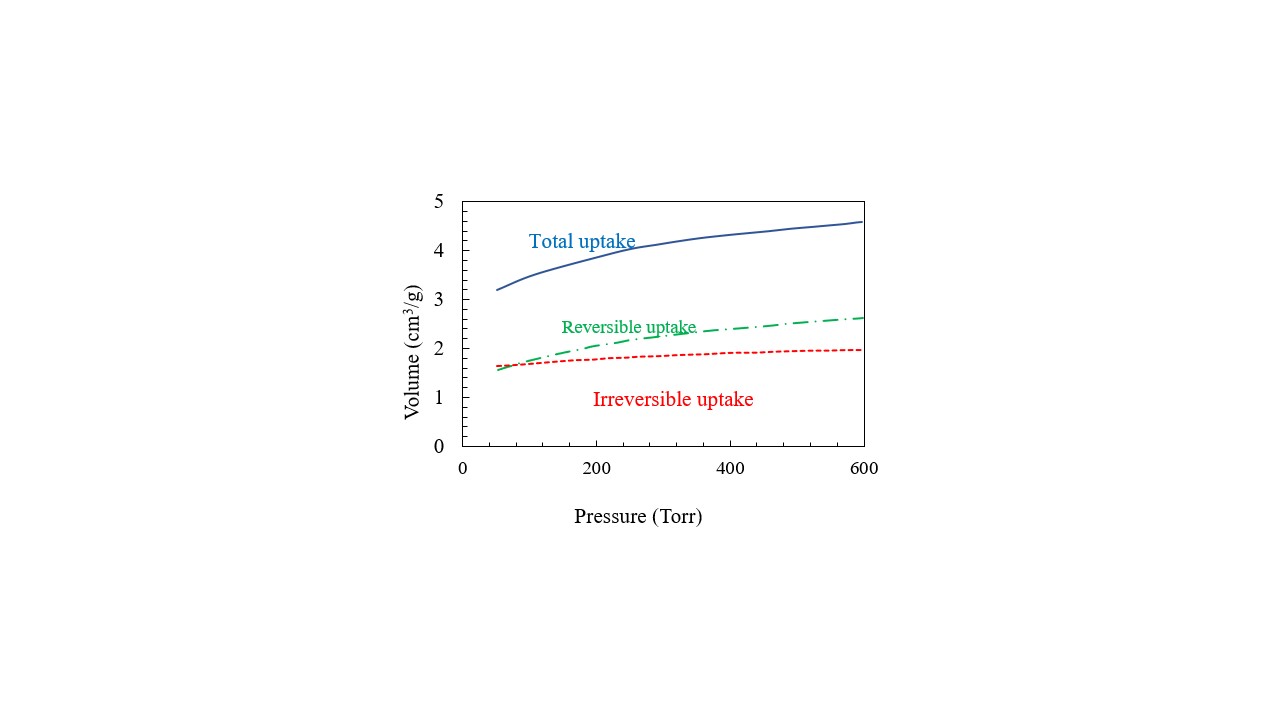


**Supplementary Figure S5:** Hydrogen uptakes of Mo2N at 673 K, redrawn from Li et al. (1996).


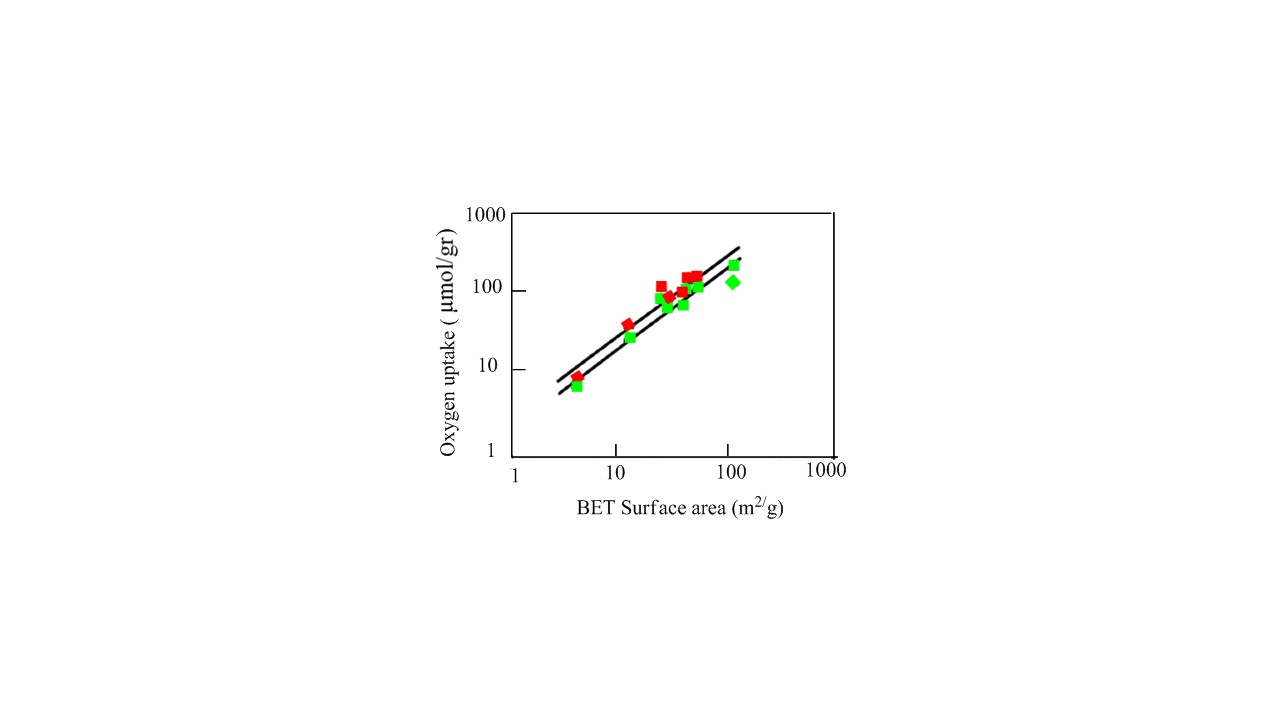


**Supplementary Figure S6:** Comparison of the BET surface areas and O2 uptakes following pre-treatment in flowing H2 at 673 K during three hours’ uptake at 298 K (red squares) and 195 K (green squares) (Choi et al., 1992). Reproduced with permission from Elsevier.


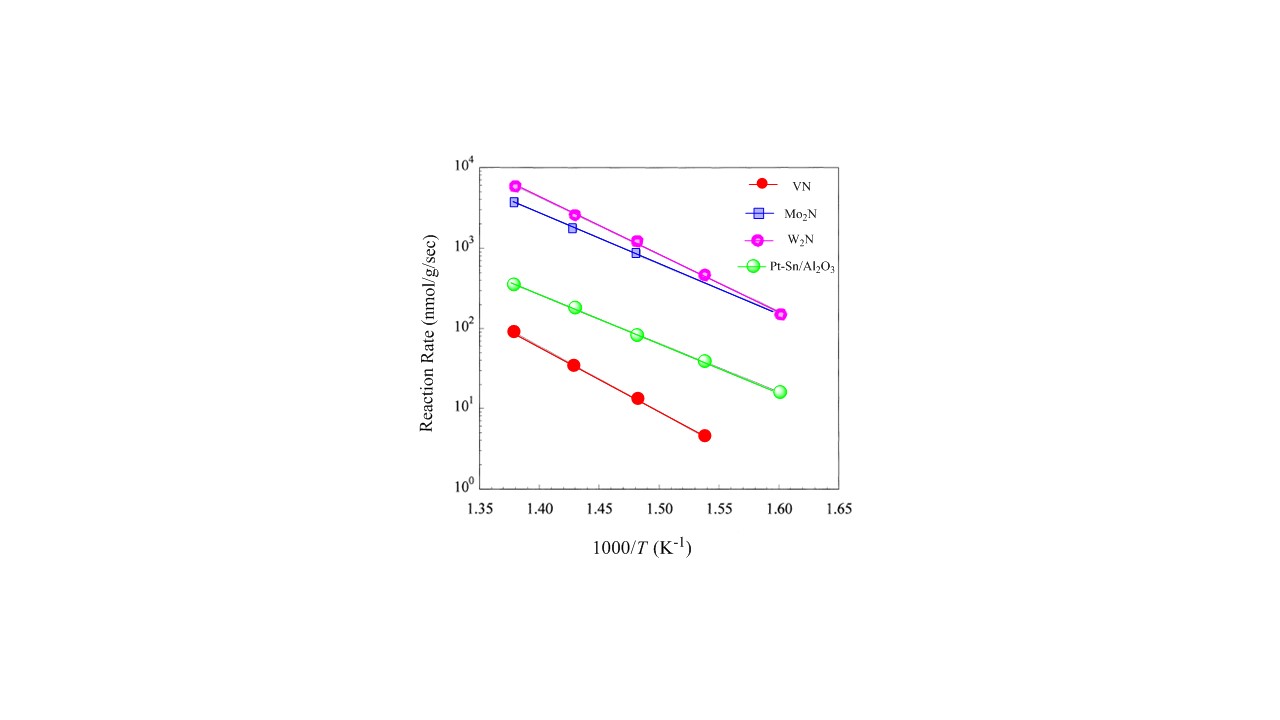


**Supplementary Figure S7:** Reaction rate constants of hydrogen evolution over transition metal carbides and nitrides during electrocatalysis, plotted as functions of inverse temperature (Neylon et al., 1999). Reproduced with permission from Elsevier.


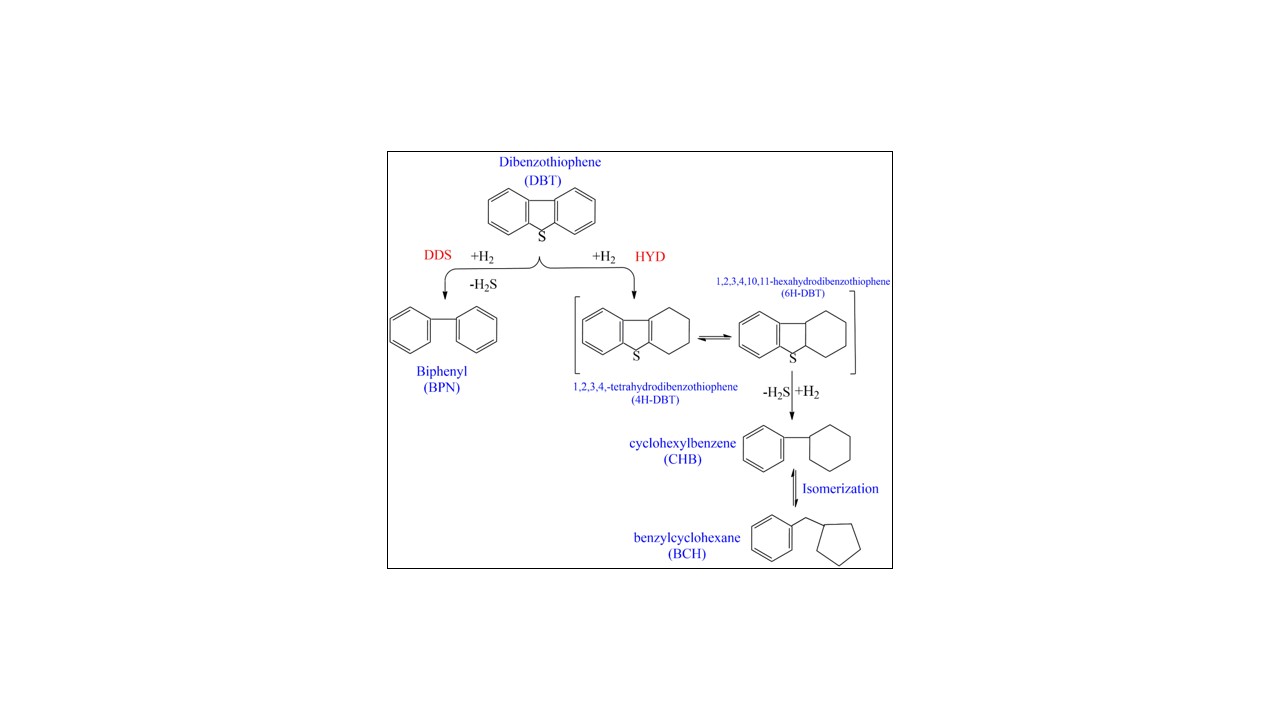


**Supplementary Figure S8:** HDS reaction routes of dibenzothiophene over Co-promoted molybdenum nitride (Co–Mo–N) catalysts proposed by Liu et al. (2002). DDS: direct desulfurization, HYD: hydrogenation. Reproduced with permission from the American Chemical Society.

**
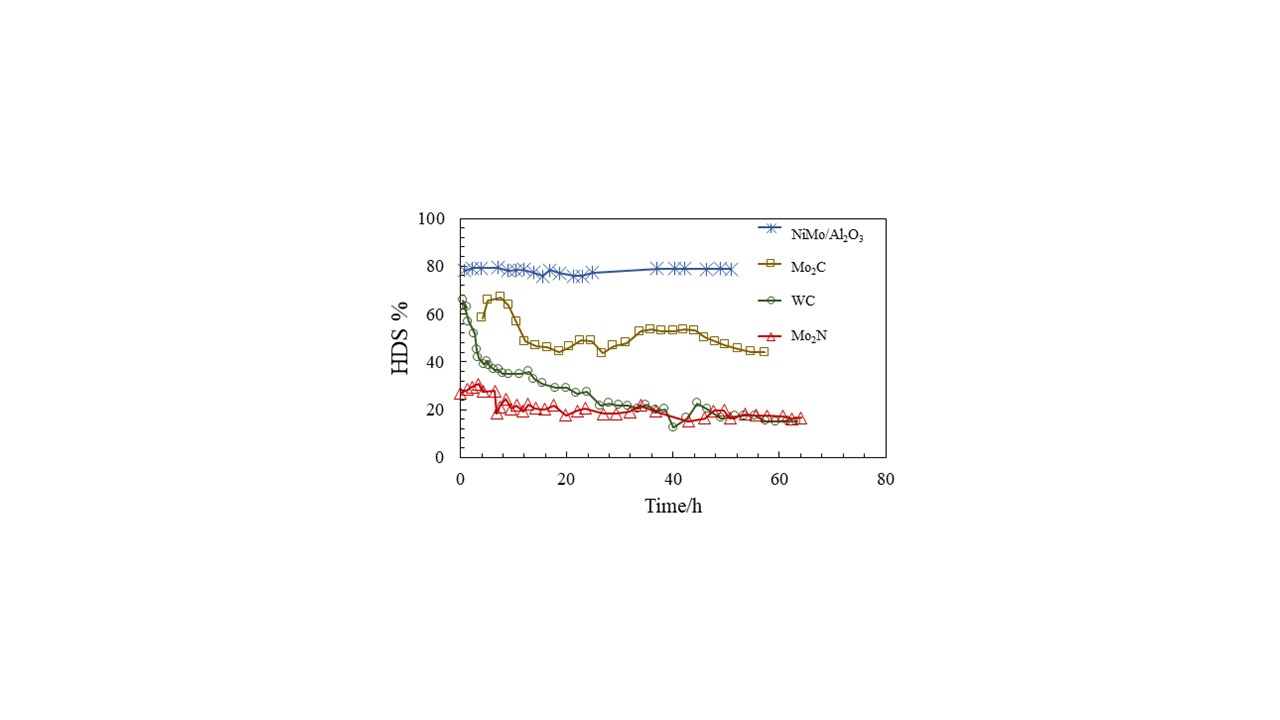
**

**Supplementary Figure S9:** HDS activities of carbides, nitrides, and (for comparison) NiMo/Al2O3 at 643 K and 3.1 MPa. The liquid hourly space velocity (LHSV) was 5 h-l (Ramanathan and Oyama, 1995). Reproduced with permission from the American Chemical Society.


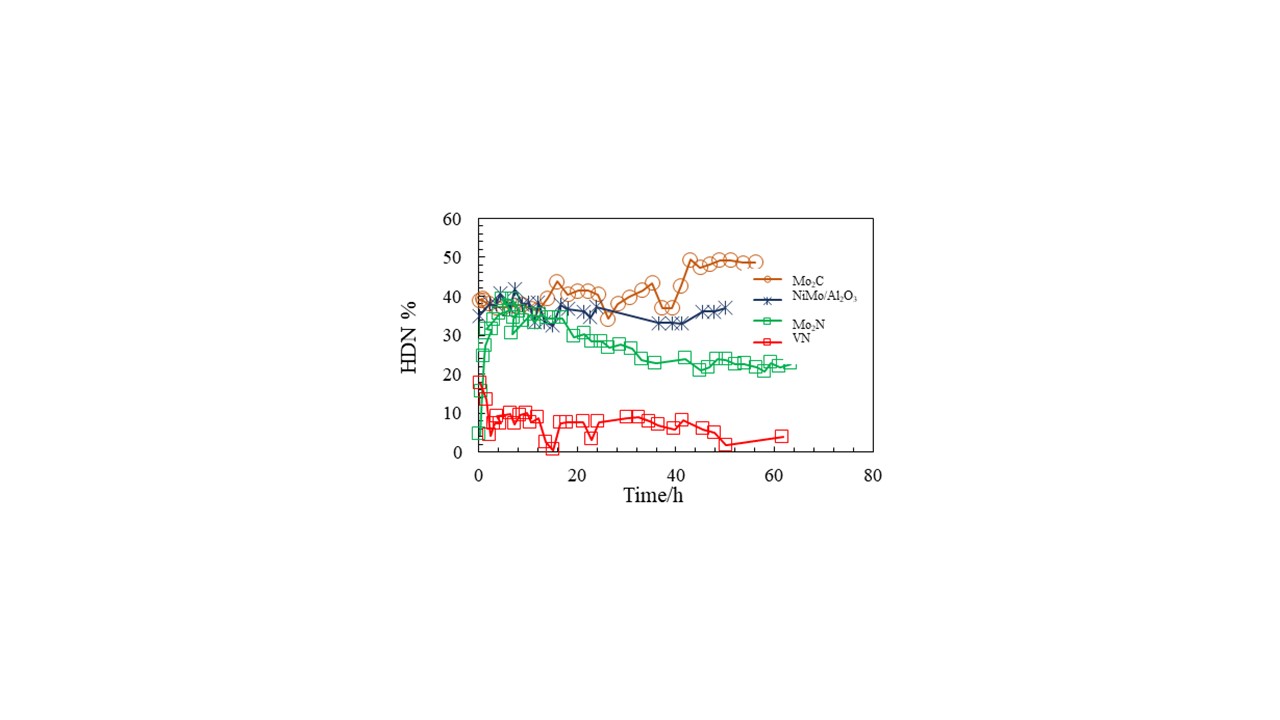


**Supplementary Figure S10:** HDN activities of carbides, nitrides, and (for comparison) NiMo/Al2O3 at 643 K and 3.1 MPa. The LHSV was 5 h-l(Ramanathan and Oyama, 1995). Reproduced with permission from the American Chemical Society.

**References**

Bull, C. L., Kawashima, T., Mcmillan, P. F., Machon, D., Shebanova, O., Daisenberger, D., Soignard, E., Takayama-Muromachi, E. and Chapon, L. C. (2006). Crystal structure and high-pressure properties of γ-Mo2N determined by neutron powder diffraction and X-ray diffraction. *J. Solid State Chem.* 179: 1762-1767.

Choi, J.-G., Brenner, J. R., Colling, C. W., Demczyk, B. G., Dunning, J. L. and Thompson, L. T. (1992). Synthesis and characterization of molybdenum nitride hydrodenitrogenation catalysts. *Catal. Today* 15: 201-222.

Claridge, J. B., York, A. P., Brungs, A. J. and Green, M. L. (2000). Study of the temperature-programmed reaction synthesis of early transition metal carbide and nitride catalyst materials from oxide precursors. *Chem. Mater.* 12: 132-142.

Ganin, A. Y., Kienle, L. and Vajenine, G. V. (2006). Synthesis and characterisation of hexagonal molybdenum nitrides. *J. Solid State Chem.* 179: 2339-2348.

Ihara, H., Kimura, Y., Senzaki, K., Kezuka, H. and Hirabayashi, M. (1985). Electronic structures of B1 MoN, fcc Mo 2 N, and hexagonal MoN. *Phys. Rev. B* 31: 3177.

Jauberteau, I., Jauberteau, J.-L., Goudeau, P., Soulestin, B., Marteau, M., Cahoreau, M. and Aubreton, J. (2009). Investigations on a nitriding process of molybdenum thin films exposed to (Ar–N2–H2) expanding microwave plasma. *Surf. Coat. Technol.* 203: 1127-1132.

Kanoun, M., Goumri-Said, S. and Jaouen, M. (2007). Structure and mechanical stability of molybdenum nitrides: a first-principles study. *Phys. Rev. B* 76: 134109.

Karam, R. and Ward, R. 1(970). Preparation of. beta.-molybdenum nitride. *Inorg. Chem.* 9: 1385-1387.

Li, X. S., Zhang, Y. J., Xin, Q., Ji, C. X., Miao, Y. F. and Wang, L. (1996). Irreversible hydrogen uptake on Mo 2 N catalyst. *React. Kinet. Catal. Lett.* 57: 177-182.

Liu, Y., Liu, C. and Que, G. (2002). Hydrodesulfurization of dibenzothiophene over cobalt− molybdenum nitride catalysts. *Energy fuels* 16: 531-535.

Lowther, J. (2004). Lattice model for the properties of non-stoichiometric cubic and hexagonal molybdenum nitride. *J. alloys Compd.* 364: 13-16.

Mändl, S., Manova, D., Gerlach, J., Assmann, W., Neumann, H.andRauschenbach, B. 2004. High temperature nitrogen plasma immersion ion implantation into molybdenum. *Surf. Coat. Technol.* 180: 362-366.

Marchand, R., Tessier, F. and Disalvo, F. J. (1999). New routes to transition metal nitrides: and characterization of new phases. *J. Mater. Chem.* 9: 297-304.

Neylon, M., Choi, S., Kwon, H., Curry, K. and Thompson, L. (1999). Catalytic properties of early transition metal nitrides and carbides: n-butane hydrogenolysis, dehydrogenation and isomerization. *Appl. Catal. A: Gen.* 183: 253-263.

Papaconstantopoulos, D., Pickett, W., Klein, B.and Boyer, L. (1985). Electronic properties of transition-metal nitrides: the group-V and group-VI nitrides VN, NbN, TaN, CrN, MoN, and WN. *Phys. Rev. B* 31: 752.

Ramanathan, S. and Oyama, S. T. (1995). New catalysts for hydroprocessing: transition metal carbides and nitrides. *J. Phys. Chem.* 99: 16365-16372.

Stöber, L., Konrath, J., Krivec, S., Patocka, F., Schwarz, S., Bittner, A., Schneider, M. and Schmid, U. (2015). Impact of sputter deposition parameters on molybdenum nitride thin film properties. *J. Micromech. Microeng.* 25: 074001.

Sun, G. D., Zhang, G. H. and Chou, K. C. (2018). Synthesis of molybdenum nitrides nanosheets by nitriding 2H‐MoS2 with ammonia. *J. Am. Ceram. Soc.* 101: 2796-2808.

Wang, Y. and Ding, Y. (2016). The hydrogen-induced structural stability and promising electronic properties of molybdenum and tungsten dinitride nanosheets: a first-principles study. *J. Mater. Chem. C* 4: 7485-7493.

Wu, J., Wu, C., Zhong, X., Song, Z. and Li, F. 1997. Surface nitridation of transition metals by pulsed laser irradiation in gaseous nitrogen. *Surf. Coat. Technol.* 96: 330-336.

Zhao, E., Wang, J. and Wu, Z. 2010. Displacive phase transition, structural stability, and mechanical properties of the ultra‐incompressible and hard MoN by first principles. *Phys. status solidi B* 247: 1207-1213.
